# Supplementary material
Source: PubMed Central journal article supplement (PMC6121934)
Supplement: 10.1194_M083741_jlr.M083741-1.pdf [file 10.1194_M083741_jlr.M083741-1.pdf]

**Supplemental Table S1. Primer sequences used for quantitative PCR.**

| <b>Gene</b>  | <b>Primer</b> | <b>Sequence 5'-3'</b>          |
|--------------|---------------|--------------------------------|
| <i>Ppara</i> | <i>FW</i>     | ATG CCA GTA CTG CCG TTT TC     |
|              | <i>RV</i>     | GGC CTT GAC CTT GTT CAT GT     |
| <i>Cpt1</i>  | <i>FW</i>     | GAG ACT TCC AAC GCA TGA CA     |
|              | <i>RV</i>     | ATG GGT TGG GGT GAT GTA GA     |
| <i>Acox1</i> | <i>FW</i>     | TAA CTT CCT CAC TCG AAG CCA    |
|              | <i>RV</i>     | AGT TCC ATG ACC CAT CTC TGT C  |
| <i>Txnip</i> | <i>FW</i>     | TCT TTT GAG GTG GTC TTC AAC G  |
|              | <i>RV</i>     | GCT TTG ACT CGG GTA ACT TCA CA |
| <i>Ucp2</i>  | <i>FW</i>     | ATG GTT GGT TTC AAG GCC ACA    |
|              | <i>RV</i>     | CGG TAT CCA GAG GGA AAG TGA T  |
| <i>Ucp3</i>  | <i>FW</i>     | CCG ATT TCA AGC CAT GAT ACG C  |
|              | <i>RV</i>     | CCT GGC GAT GGT TCT GTA GG     |
| <i>Nox4</i>  | <i>FW</i>     | GAA GGG GTT AAA CAC CTC TGC    |
|              | <i>RV</i>     | ATG CTC TGC TTA AAC ACA ATC CT |
| <i>Tfam</i>  | <i>FW</i>     | ATT CCG AAG TGT TTT TCC AGC A  |
|              | <i>RV</i>     | TCT GAA AGT TTT GCA TCT GGG T  |
| <i>Hprt</i>  | <i>FW</i>     | AGT CCC AGC GTC GTG ATT AG     |
|              | <i>RV</i>     | TTT CCA AAT CCT CGG CAT AAT GA |
| <i>B2M</i>   | <i>FW</i>     | CCC CAC TGA GAC TGA TAC ATA CG |
|              | <i>RV</i>     | CGA TCC CAG TAG ACG GTC TTG    |
| <i>12S</i>   | <i>FW</i>     | ACC GCG GTC ATA CGA TTA AC     |
|              | <i>RV</i>     | CCC AGT TTG GGT CTT AGC TG     |
| <i>Cox1</i>  | <i>FW</i>     | GCC CCA GAT ATA GCA TTC CC     |
|              | <i>RV</i>     | GTT CAT CCT GTT CCT GCT CC     |

**Supplemental Table S2. Plasma oxylipin concentration [nM].**

| metabolites [in nM] | low LA |       |   | high LA              |       |   | OXLAMs             |       |   |
|---------------------|--------|-------|---|----------------------|-------|---|--------------------|-------|---|
|                     | mean   | SEM   | N | Mean                 | SEM   | N | Mean               | SEM   | N |
| 10(11)-EpDPE        | 8.1    | 0.7   | 8 | 8.1                  | 0.5   | 8 | 7.4                | 0.4   | 8 |
| 11(12)-EpETrE       | 130.6  | 42.2  | 8 | 154.7                | 36.1  | 8 | 149.8              | 32.0  | 8 |
| 13(14)-EpDPE        | 218.5  | 71.7  | 8 | 849.7 <sup>b,c</sup> | 206.6 | 8 | 320.5 <sup>c</sup> | 101.9 | 8 |
| 14(15)-EpETE        | 38.2   | 12.6  | 7 | 39.4                 | 7.7   | 8 | 37.8               | 8.1   | 8 |
| 14(15)-EpETrE       | 3.9    | 1.0   | 6 | 2.4                  | 0.4   | 7 | 2.3                | 0.7   | 8 |
| 16(17)-EpDPE        | 13.6   | 4.9   | 7 | 27.7 <sup>b</sup>    | 5.3   | 8 | 12.7               | 2.7   | 8 |
| 17(18)-EpETE        | 755.7  | 264.2 | 7 | 766.3                | 144.2 | 8 | 618.9              | 172.3 | 8 |
| 5(6)-EpETrE         | 6.3    | 2.1   | 6 | 2.5                  | 0.6   | 8 | 3.2                | 0.8   | 8 |
| 7(8)-EpDPE          | 30.7   | 11.6  | 8 | 75.5 <sup>b</sup>    | 19.7  | 8 | 37.6               | 8.8   | 8 |
| 8(9)-EpETE          | 66.8   | 19.9  | 6 | 61.1                 | 16.1  | 8 | 63.1               | 14.4  | 8 |
| 8(9)-EpETrE         | 2.0    | 0.6   | 6 | 1.5                  | 0.4   | 7 | 1.1                | 0.3   | 8 |
| 9(10)-EpOME         | 39.3   | 12.6  | 7 | 90.8 <sup>b</sup>    | 21.3  | 8 | 42.8               | 11.2  | 8 |
| 11,12-DiHETrE       | 151.2  | 44.3  | 8 | 635.4 <sup>b,c</sup> | 151.2 | 8 | 141.7 <sup>c</sup> | 29.9  | 8 |
| 11(12)-EpETE        | 2.1    | 0.2   | 8 | 2.9                  | 0.4   | 8 | 1.4                | 0.2   | 8 |
| 12,13-DiHOME        | 5.2    | 1.7   | 8 | 4.0                  | 1.0   | 8 | 3.2                | 0.4   | 8 |
| 14,15-DiHETE        | 299.6  | 92.7  | 8 | 542.0                | 98.7  | 8 | 607.2 <sup>a</sup> | 42.9  | 8 |
| 14,15-DiHETrE       | 1.3    | 0.1   | 8 | 1.0                  | 0.2   | 8 | 0.8                | 0.1   | 8 |
| 17,18-DiHETE        | 23.7   | 3.4   | 8 | 30.7                 | 2.5   | 8 | 19.5               | 3.0   | 8 |
| 19(20)-EpDPE        | 8.6    | 1.1   | 8 | 4.6                  | 0.7   | 8 | 4.4                | 0.6   | 8 |
| 5,15-DiHETE         | 57.8   | 15.7  | 8 | 80.2                 | 13.4  | 8 | 36.8               | 4.3   | 8 |

|                 |       |      |   |                       |       |   |                      |       |   |
|-----------------|-------|------|---|-----------------------|-------|---|----------------------|-------|---|
| 5,6-DiHETE      | 543.7 | 26.4 | 8 | 517.5                 | 24.9  | 7 | 351.0                | 41.9  | 8 |
| 5,6-DiHETrE     | 0.2   | 0.0  | 8 | 0.2                   | 0.0   | 8 | 0.1                  | 0.0   | 8 |
| 8,9-DiHETrE     | 0.2   | 0.0  | 8 | 0.2                   | 0.1   | 8 | 0.3                  | 0.1   | 8 |
| 6-keto-PGF1a    | 170.4 | 34.9 | 8 | 642.7 <sup>b</sup>    | 227.8 | 8 | 875.9 <sup>a,b</sup> | 139.7 | 8 |
| 13-HODE         | 31.4  | 4.8  | 8 | 82.3                  | 48.0  | 8 | 20.6                 | 3.6   | 8 |
| 17-HDoHE        | 196.5 | 29.1 | 8 | 1074.8 <sup>b,c</sup> | 564.9 | 8 | 167.8 <sup>c</sup>   | 27.7  | 8 |
| 9-HOTrE         | 114.3 | 22.6 | 8 | 99.0                  | 33.2  | 8 | 61.4                 | 7.9   | 7 |
| 9-HODE          | 19.1  | 3.7  | 8 | 55.1                  | 27.5  | 8 | 21.7                 | 4.2   | 8 |
| 20-COOH-LTB4    | 1.4   | 0.3  | 8 | 7.6 <sup>b,c</sup>    | 4.4   | 8 | 1.3 <sup>c</sup>     | 0.2   | 8 |
| 9,10,13-TriHOME | 10.6  | 0.9  | 8 | 25.8                  | 10.2  | 8 | 9.5                  | 1.0   | 8 |
| 9,12,13-TriHOME | 1.2   | 0.2  | 8 | 3.8 <sup>b</sup>      | 1.4   | 8 | 1.8                  | 0.3   | 8 |
| PGB2            | 15.9  | 2.9  | 8 | 47.8 <sup>b</sup>     | 13.1  | 8 | 26.8                 | 3.5   | 8 |
| 20-HETE         | 61.7  | 19.1 | 8 | 135.4 <sup>b</sup>    | 39.2  | 8 | 54.6                 | 16.7  | 8 |
| 9-oxo-ODE       | 5.0   | 0.7  | 7 | 5.2                   | 0.8   | 8 | 4.5                  | 0.5   | 7 |
| 11-HETE         | 2.2   | 0.6  | 8 | 7.7 <sup>b,c</sup>    | 3.5   | 8 | 1.2 <sup>c</sup>     | 0.3   | 8 |
| 12-HEPE         | 17.1  | 4.4  | 7 | 59.9 <sup>c</sup>     | 25.6  | 8 | 10.6 <sup>c</sup>    | 1.7   | 8 |
| 12-HETE         | 152.2 | 52.0 | 8 | 119.4                 | 74.7  | 8 | 31.6 <sup>a</sup>    | 10.5  | 8 |
| 12-oxo-ETE      | 39.6  | 9.9  | 8 | 132.8 <sup>c</sup>    | 85.3  | 8 | 9.2 <sup>a,c</sup>   | 2.5   | 8 |
| 15-oxo-ETE      | 2.6   | 0.7  | 7 | 5.9 <sup>c</sup>      | 2.5   | 8 | 1.7 <sup>c</sup>     | 0.4   | 7 |
| 5-HEPE          | 5.8   | 1.9  | 7 | 11.8                  | 5.1   | 8 | 7.5                  | 1.5   | 8 |
| 5-oxo-ETE       | 7.6   | 2.1  | 8 | 16.2                  | 5.0   | 8 | 7.2                  | 1.2   | 8 |

**Supplemental Table S2. List of plasma oxylipins [nM].** Data are represented as mean  $\pm$  standard error (SEM) and number of samples (N). EpOME: epoxy-octadecenoic acid; DiHOME: dihydroxy-octadecenoic acid; TriHOME: trihydroxyoctadecenoic acid; HOTrE: hydroxy-octadecatrienoic acid; HODE: hydroxy-

octadecadienoic acid; oxo-ODE: oxo-octadecadienoic acid; HDoHE: hydroxy Docosahexaenoic Acid; PGB: prostaglandin; LTB: Leukotriene; ETE: eicosatetraenoic acid; HETE: hydroxyeicosatetraenoic acid HEPE: hydroxyicosa-pentaenoic acid. Significances were calculated by one-way ANOVA and Sidak post-hoc test of log-transformed data. <sup>a</sup>OXLAMs vs. low LA, <sup>b</sup>high LA vs. low LA, <sup>c</sup>high LA vs. OXLAMs.  $p < 0.05$  was considered significant. Data sets with more than 30% missing values were not included in the analysis.

**Supplemental Figure S1. Effect of high LA and OXLAMs on NADPH oxidase, p38 and apoptosis.**

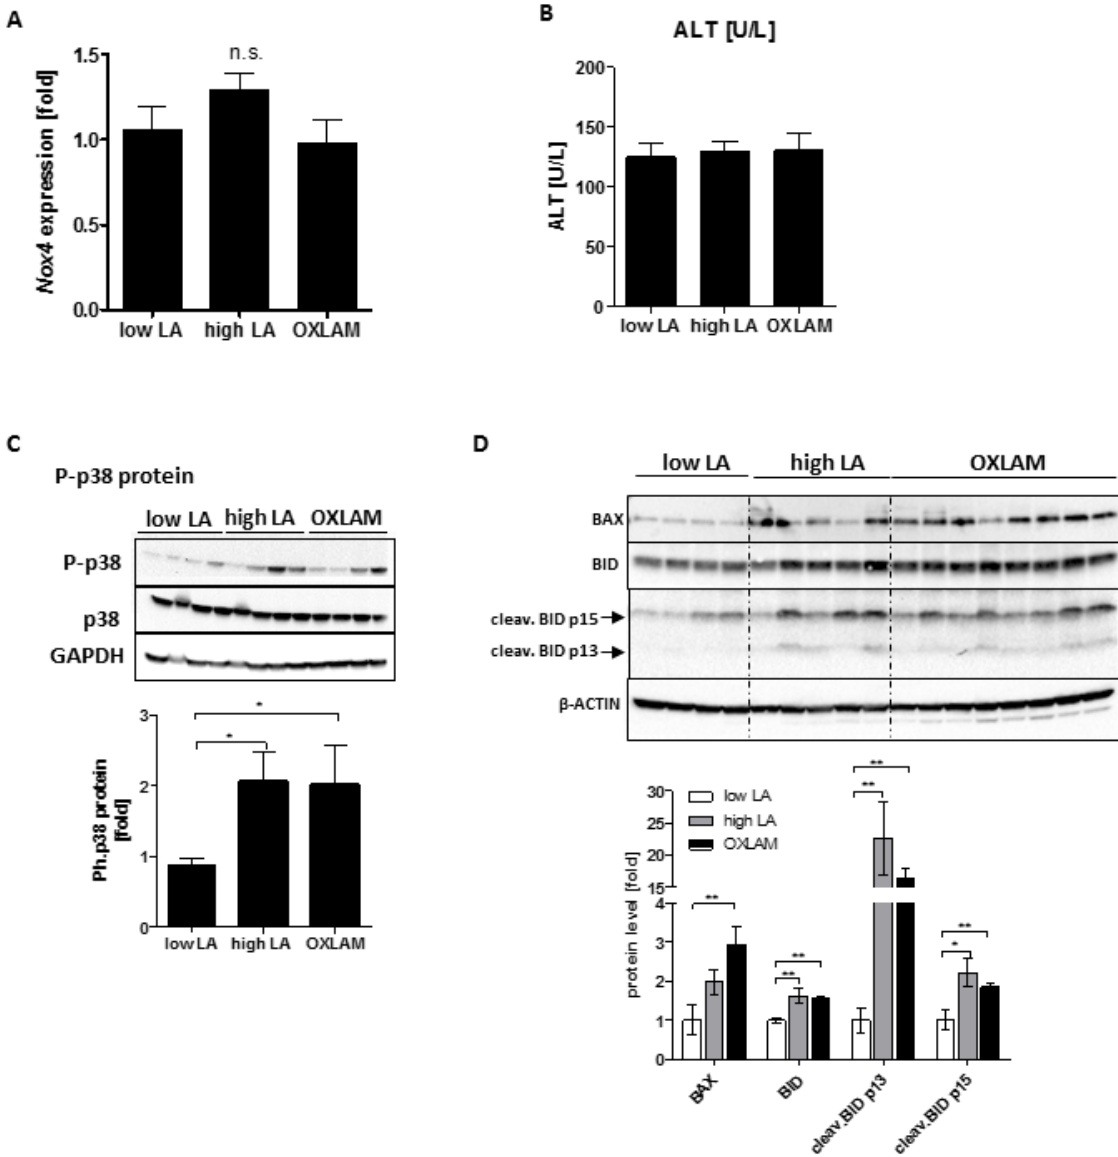

**Supplemental Figure S1.** (A) mRNA expression of *Nox4* in mouse liver tissue. Gene expression was normalized on housekeeping genes (*Hprt* and *B2M*) and depicted as fold over control. Low LA group was set at 1. (B) Serum ALT levels [U/L]. Immunoblot analysis of (C) P-p38 and total p38; (D) Bax protein, Bid and cleaved Bid (13kDa+15kDa) protein in liver protein lysate. GAPDH and  $\beta$ -Actin were used as loading controls and densitometric analysis was performed on background-subtracted blots and normalized to loading control (GAPDH,  $\beta$ -Actin). The low LA group was set at 1.

**Supplemental Figure S2. Primary Hepatocytes from WT and Nlrp3 KO stimulated with OXLAMs.**

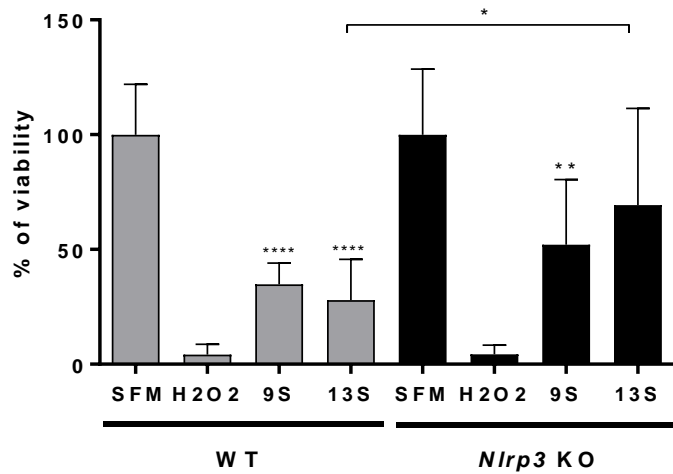

**Supplemental Figure S2. Cell viability assay of primary hepatocytes isolated from WT and global *Nlrp3* KO mice stimulated with OXLAMs.** H<sub>2</sub>O<sub>2</sub> (0.1%) was used as positive cytotoxic control. OXLAMs (9(S)-and 13(S)-HODE [50uM]) were stimulated in serum-free media (SFM) for 48h. Data were normalized on cells in SFM. Differences between the groups were calculated by one-way ANOVA and Bonferroni selected post-hoc test. Level of significance: p<0.05.
